# Supplementary material for: A comprehensive characterization of simple sequence repeats in pepper genomes provides valuable resources for marker development in Capsicum
Source: PubMed Central journal article supplement (PMC4703971; doi:10.1038/srep18919), 2016-01-07
Supplement: srep18919-s1.pdf [file srep18919-s1.pdf]

**A comprehensive characterization of simple sequence repeats in pepper genomes provides valuable resources for marker development in *Capsicum***

Jiaowen Cheng, Zicheng Zhao, Bo Li, Cheng Qin, Zhiming Wu, Diana L. Trejo-Saavedra, Xirong Luo, Junjie Cui, Rafael F. Rivera-Bustamante, Shuaicheng Li, Kailin Hu

**SUPPLEMENTARY INFORMATION**

**TABLE of CONTENTS**

|                                                                                                                                      |    |
|--------------------------------------------------------------------------------------------------------------------------------------|----|
| I. Supplementary Tables .....                                                                                                        | 2  |
| II. Supplementary Figures .....                                                                                                      | 17 |
| Supplementary Figure S1. Overview of SSR distribution in Chiltepin genome. ....                                                      | 17 |
| Supplementary Figure S2. Overview of SSR distribution in pepper M2 mitochondrial genome. ....                                        | 18 |
| Supplementary Figure S3. Overview of SSR distribution in pepper C2 chloroplast genome. ....                                          | 19 |
| Supplementary Figure S4. Relative frequency of SSR motif with different length, by the number of repeats in six pepper genomes. .... | 20 |
| Supplementary Figure S5. Relative frequency of SSR motif with different length, by number of repeats in five plant species. ....     | 21 |
| Supplementary Figure S6. Number and density comparison of SSR units on 13 chromosomes of Zunla-1 reference genome. ....              | 22 |
| Supplementary Figure S7. Genotyping of 21 pepper lines with three newly developed polymorphic SSR markers. ....                      | 23 |

## I. Supplementary Tables

**Supplementary Table S1. A representative collection of 21 pepper genotypes for availability test of SSR primer pairs.**

| Number | Varieties | Species              | Origin of location      | Phenotypic characterization of fruit                  |
|--------|-----------|----------------------|-------------------------|-------------------------------------------------------|
| 1      | YNXML     | <i>C. frutescens</i> | Yunnan, China           | small fruit size, erect, pungent, green               |
| 2      | HYL       | <i>C. chinense</i>   | Hainan, China           | middle fruit size, pendent, pungent, yellow           |
| 3      | /         | <i>C. baccatum</i>   | Bolivia (South America) | middle fruit size, pendent, pungent, green            |
| 4      | Zunla-1   | <i>C. annuum</i>     | Guizhou, China          | small fruit size, erect, pungent, green               |
| 5      | CM334     | <i>C. annuum</i>     | Morelos, Mexico         | small fruit size, erect, pungent, green               |
| 6      | BA3       | <i>C. annuum</i>     | Guangdong, China        | middle fruit size, pendent, pungent, green            |
| 7      | B702      | <i>C. annuum</i>     | Guangdong, China        | small fruit size, pendent, pungent, green             |
| 8      | ZJ14      | <i>C. annuum</i>     | Guizhou, China          | small fruit size, erect and fascicled, pungent, green |
| 9      | 11c255-1  | <i>C. annuum</i>     | Beijing, China          | large fruit size, pendent, non-pungent, green         |
| 10     | 11c320-1  | <i>C. annuum</i>     | Beijing, China          | large fruit size, pendent, non-pungent, green         |
| 11     | 11c1363-1 | <i>C. annuum</i>     | Beijing, China          | line fruit shape, pendent, pungent, green             |
| 12     | QBY       | <i>C. annuum</i>     | Guizhou, China          | small fruit size, erect, pungent, green               |
| 13     | 2308      | <i>C. annuum</i>     | Guangdong, China        | middle fruit size, pendent, pungent, green            |
| 14     | G16       | <i>C. annuum</i>     | Guangdong, China        | small fruit size, erect, pungent, purple              |
| 15     | QKY       | <i>C. annuum</i>     | Guizhou, China          | small fruit size, erect, pungent, green               |
| 16     | DFSJ      | <i>C. annuum</i>     | Guangdong, China        | large fruit size, pendent, pungent, green             |
| 17     | H36       | <i>C. annuum</i>     | Hunan, China            | middle fruit size, pendent, pungent, green            |

|    |           |                                            |                   |                                                                  |
|----|-----------|--------------------------------------------|-------------------|------------------------------------------------------------------|
| 18 | H40       | <i>C. annuum</i>                           | Hunan, China      | middle fruit size, pendent, pungent, green                       |
| 19 | H46       | <i>C. annuum</i>                           | Jiangsu, China    | large fruit size, pendent, pungent, green                        |
| 20 | Chiltepin | <i>C. annuum</i> var. <i>glabriusculum</i> | Queretaro, Mexico | small fruit size, erect, pungent, green, fertile, semi-wild type |
| 21 | B088      | <i>C. annuum</i>                           | Guangdong, China  | middle fruit size, pendent, pungent, green                       |

**Supplementary Table S2. List of 11 different genomes for SSR identification in present study.**

| Name of variety/Species | Latin name                                      | Genome type   | Abbr. | Chromosome Number | Accession number or release version | Genome Size (bp) | References or web sources                                                                                                                                                                                                                                                      |
|-------------------------|-------------------------------------------------|---------------|-------|-------------------|-------------------------------------|------------------|--------------------------------------------------------------------------------------------------------------------------------------------------------------------------------------------------------------------------------------------------------------------------------|
| Zunla-1                 | <i>Capsicum annuum</i><br><i>C. annuum</i> var. | Nuclear       | N1    | 13                | Release 2.0                         | 3,363,962,270    | <a href="http://peppersequence.genomics.cn/page/species/index.jsp">http://peppersequence.genomics.cn/page/species/index.jsp</a>                                                                                                                                                |
| Chiltepin               | <i>glabriusculum</i>                            | Nuclear       | N2    | 13                | Release 2.0                         | 3,528,040,346    | <a href="http://peppersequence.genomics.cn/page/species/index.jsp">http://peppersequence.genomics.cn/page/species/index.jsp</a>                                                                                                                                                |
| FS4401                  | <i>C. annuum</i>                                | Mitochondrial | M1    | 1                 | KJ865409                            | 507,452          | Jo et al. 2014                                                                                                                                                                                                                                                                 |
| Jeju                    | <i>C. annuum</i>                                | Mitochondrial | M2    | 1                 | KJ865410                            | 511,530          | Jo et al. 2014                                                                                                                                                                                                                                                                 |
| FS4401                  | <i>C. annuum</i>                                | Chloroplast   | C1    | 1                 | NC_018552                           | 156,781          | Jo et al. 2011                                                                                                                                                                                                                                                                 |
| American bird pepper    | <i>C. annuum</i> var.<br><i>glabriusculum</i>   | Chloroplast   | C2    | 1                 | KJ619462                            | 156,612          | Zeng et al. 2014                                                                                                                                                                                                                                                               |
| Tomato                  | <i>Solanum lycopersicum</i>                     | Nuclear       | T     | 13                | SL2.50                              | 823,944,053      | <a href="ftp://ftp.solgenomics.net/tomato_genome/assembly/build_2.50/">ftp://ftp.solgenomics.net/tomato_genome/assembly/build_2.50/</a><br><a href="http://solanaceae.plantbiology.msu.edu/pgsc_download.shtml">http://solanaceae.plantbiology.msu.edu/pgsc_download.shtml</a> |
| Potato                  | <i>Solanum tuberosum</i>                        | Nuclear       | P     | 13                | version 4.03                        | 773,029,444      | <a href="ftp://www.icugi.org/pub/genome/cucumber/Chinese_long/v2/">ftp://www.icugi.org/pub/genome/cucumber/Chinese_long/v2/</a>                                                                                                                                                |
| Cucumber                | <i>Cucumis sativus</i>                          | Nuclear       | Cu    | 8                 | version 2                           | 198,529,394      | <a href="ftp://ftp.arabidopsis.org/home/tai">ftp://ftp.arabidopsis.org/home/tai</a>                                                                                                                                                                                            |
| Arabidopsis             | <i>Arabidopsis thaliana</i>                     | Nuclear       | A     | 5                 | version 10                          | 119,146,352      |                                                                                                                                                                                                                                                                                |







|   |              |        |        |        |       |       |       |        |        |       |       |       |       |     |     |     |     |     |       |                |
|---|--------------|--------|--------|--------|-------|-------|-------|--------|--------|-------|-------|-------|-------|-----|-----|-----|-----|-----|-------|----------------|
|   | Hexa-        | 121    | 38     | 9      | 2     | 3     | 1     | 2      | 0      | 0     | 0     | 1     | 0     | 0   | 1   | 0   | 0   | 0   | 0     | 178            |
|   | <b>Total</b> |        |        |        |       |       |       |        |        |       |       |       |       |     |     |     |     |     |       | <b>63,046</b>  |
| R | Mono-        | 0      | 0      | 0      | 0     | 0     | 0     | 36,537 | 11,850 | 6,236 | 3,467 | 2,176 | 1,416 | 883 | 598 | 486 | 332 | 243 | 607   | 64,831         |
|   | Di-          | 0      | 0      | 12,817 | 6,790 | 3,995 | 2,626 | 1,743  | 1,154  | 845   | 659   | 553   | 516   | 424 | 370 | 330 | 328 | 294 | 3,926 | 37,370         |
|   | Tri-         | 52,359 | 17,919 | 6,730  | 2,797 | 987   | 437   | 177    | 107    | 71    | 52    | 35    | 44    | 29  | 31  | 36  | 32  | 27  | 301   | 82,171         |
|   | Tetra-       | 5,641  | 1,474  | 447    | 195   | 111   | 73    | 59     | 41     | 27    | 25    | 24    | 18    | 9   | 9   | 11  | 4   | 5   | 37    | 8,210          |
|   | Penta-       | 2,353  | 484    | 95     | 18    | 3     | 0     | 0      | 3      | 0     | 0     | 0     | 0     | 0   | 0   | 1   | 0   | 0   | 1     | 2,958          |
|   | Hexa-        | 1,133  | 182    | 47     | 14    | 6     | 1     | 1      | 2      | 2     | 2     | 0     | 1     | 0   | 1   | 0   | 0   | 0   | 1     | 1,393          |
|   | <b>Total</b> |        |        |        |       |       |       |        |        |       |       |       |       |     |     |     |     |     |       | <b>196,933</b> |

—: this type of SSR were not detected in the present study.

#### **Supplementary Table S4. Frequency of classified SSR motif (1~6bp) in different genomes<sup>a</sup>.**

This table is provided in the form of a single file.

#### **Supplementary Table S5. List of 11,772 unique SSR primer pairs identified from the chromosome P0 of Zunla-1 reference genome.**

This table is provided in the form of a single file.

#### **Supplementary Table S6. List of 31,111 unique SSR primer pairs identified from the chromosomes P1 to P3 of Zunla-1 reference genome.**

This table is provided in the form of a single file.

**Supplementary Table S7. List of 24,982 unique SSR primer pairs identified from the chromosomes P4 to P6 of Zunla-1 reference genome.**

This table is provided in the form of a single file.

**Supplementary Table S8. List of 22,024 unique SSR primer pairs identified from the chromosomes P7 to P9 of Zunla-1 reference genome.**

This table is provided in the form of a single file.

**Supplementary Table S9. List of 23611 unique SSR primer pairs identified from the chromosomes P10 to P12 of Zunla-1 reference genome.**

This table is provided in the form of a single file.

**Supplementary Table S10. Information of the 88 newly developed SSR markers from chromosome P0 in present study.**

| Nomenclature <sup>a</sup>     | SSR  |           | size | Chr | start       | end         | Forward primer (5'-3')   | Tm( °C) | Reverse primer (5'-3')     | Tm( °C) |
|-------------------------------|------|-----------|------|-----|-------------|-------------|--------------------------|---------|----------------------------|---------|
|                               | type | SSR       |      |     |             |             |                          |         |                            |         |
| SSR_P0_163110979 <sup>#</sup> | p6   | (TTTAAT)4 | 24   | P0  | 163,110,979 | 163,111,002 | ACGGTTGGTGGACTCTCAT<br>T | 58.94   | GGGATTTGCGAAAACCTT<br>GCA  | 57.85   |
| SSR_P0_164189256 <sup>#</sup> | p5   | (CATGT)4  | 20   | P0  | 164,189,256 | 164,189,275 | CGCACCTTTTCCGACTCTT<br>T | 58.77   | AGAAAGTCACTCCTCTC<br>CGC   | 59.11   |
| SSR_P0_438581243 <sup>#</sup> | p6   | (TATTTT)4 | 24   | P0  | 438,581,243 | 438,581,266 | AGTCGACTTACAGCTGAGG<br>T | 58.09   | ACCATATAATCACGCCT<br>CAAGA | 57.04   |
| SSR_P0_449855951 <sup>#</sup> | p6   | (CCATCT)9 | 54   | P0  | 449,855,951 | 449,856,004 | GCCGTCACCTTCGATTACA<br>C | 59.00   | TGTAATCGACGGTGCTA<br>GCA   | 59.19   |
| SSR_P0_456808942 <sup>#</sup> | p6   | (CAACTT)5 | 30   | P0  | 456,808,942 | 456,808,971 | AAGCTCAGGACTCGTTTCA      | 57.59   | ACGTGAATGAGCCAAGT          | 57.67   |



|                               |    |             |    |    |             |             |                      |       |                     |       |
|-------------------------------|----|-------------|----|----|-------------|-------------|----------------------|-------|---------------------|-------|
|                               |    |             |    |    |             |             | TT                   |       | ATGT                |       |
|                               |    |             |    |    |             |             | TACATCCGCCTCTGAACTC  |       | TTTACTTGTGGTTTTCGGA |       |
| SSR_P0_462067694 <sup>#</sup> | p6 | (ATATTC)4   | 24 | P0 | 462,067,694 | 462,067,717 | C                    | 58.89 | AGC                 | 57.03 |
|                               |    | (TA)6(ATA   |    |    |             |             | TGGCTGTTACCGGTCATCT  |       | TGCGTAACAGAGGATTG   |       |
| SSR_P0_471765445 <sup>#</sup> | c* | A)5*        | 29 | P0 | 471,765,445 | 471,765,473 | T                    | 59.02 | CAG                 | 58.27 |
|                               |    |             |    |    |             |             | ACAAGTATGGAGGGAGCA   |       | CTCCCGAGGCCCCATAT   |       |
| SSR_P0_480209261 <sup>#</sup> | c* | (AT)6(T)13* | 24 | P0 | 480,209,261 | 480,209,284 | AATT                 | 57.68 | ATC                 | 58.88 |
|                               |    |             |    |    |             |             | AGGGGTGTGACATCGTTCA  |       | CCAGAATCACTACCCAA   |       |
| SSR_P0_480718061 <sup>#</sup> | p4 | (ATAA)4     | 16 | P0 | 480,718,061 | 480,718,076 | T                    | 59.02 | GGC                 | 57.96 |
|                               |    | (G)16(GAG)  |    |    |             |             | AACTGTGCTCCTCCCTTCT  |       | TCGCCATTCACTTCACTC  |       |
| SSR_P0_480905753 <sup>#</sup> | c* | 4*          | 27 | P0 | 480,905,753 | 480,905,779 | C                    | 59.02 | CT                  | 59.02 |
|                               |    |             |    |    |             |             | TCAAGACTTTTTCATCACAC |       | AGGAATTGAAGGATCGG   |       |
| SSR_P0_480940810              | p4 | (TATT)4     | 16 | P0 | 480,940,810 | 480,940,825 | CAGA                 | 57.97 | AGGG                | 59.23 |
|                               |    |             |    |    |             |             | GCCCGTCACTAAAAGTCTC  |       | TCTGGAATGGCTGTACT   |       |
| SSR_P0_487884506 <sup>#</sup> | p4 | (TAAT)4     | 16 | P0 | 487,884,506 | 487,884,521 | C                    | 58.28 | ACCA                | 58.17 |
|                               |    |             |    |    |             |             | CCTAGAATGACCCCGACTG  |       | GGGGCTCCATACCAGAA   |       |
| SSR_P0_488531631 <sup>#</sup> | p2 | (TA)7       | 14 | P0 | 488,531,631 | 488,531,644 | T                    | 58.51 | AGA                 | 58.79 |
|                               |    |             |    |    |             |             | TGATGATACATATGTCTG   |       | CCAAGA              | 57.58 |
| SSR_P0_489955492              | p2 | (AT)6       | 12 | P0 | 489,955,492 | 489,955,503 | CATCACACACCCCAATGCC  | 59.11 | TCGGTGTCCAATGGTAA   |       |
|                               |    |             |    |    |             |             | ACTAACTGAAACGGCTGA   |       | GCT                 | 59.02 |
| SSR_P0_491728482 <sup>#</sup> | p2 | (AG)6       | 12 | P0 | 491,728,482 | 491,728,493 | CAC                  | 58.52 | AATCCGACTCACCTTCA   |       |
|                               |    |             |    |    |             |             | CGGTGGCTAGAGAGGAAG   |       | GCA                 | 59.02 |
| SSR_P0_491740645 <sup>#</sup> | p6 | (TGCTGA)4   | 24 | P0 | 491,740,645 | 491,740,668 | AG                   | 58.97 | TGTATACAAAAGCGTGG   |       |
|                               |    | (AAT)5tataa |    |    |             |             | TGTGGGATTGGCGCTTTAA  |       | CGG                 | 58.92 |
| SSR_P0_493610495 <sup>#</sup> | c  | taac(AAT)6  | 42 | P0 | 493,610,495 | 493,610,536 | G                    | 58.83 |                     |       |

|                               |    |                                    |    |    |             |             |                                            |       |                               |       |
|-------------------------------|----|------------------------------------|----|----|-------------|-------------|--------------------------------------------|-------|-------------------------------|-------|
| SSR_P0_494287518              | p1 | (T)10<br>(A)13gcacaa<br>caaac(AAT) | 10 | P0 | 494,287,518 | 494,287,527 | TGTGGTTTGGCTTTGAAGG<br>G                   | 58.88 | AGTCACTTAACCATTTTG<br>ACGTGA  | 58.88 |
| SSR_P0_494755411 <sup>#</sup> | c  | 6<br>(ATTT)4cct                    | 42 | P0 | 494,755,411 | 494,755,452 | GTGAAGTCCGGAGAGAGT<br>GA                   | 58.46 | GGCCGAGGATATGAAGG<br>TGA      | 58.95 |
| SSR_P0_494756680 <sup>#</sup> | c  | c(T)12                             | 32 | P0 | 494,756,680 | 494,756,711 | ACGCGCTTTGTCATGTGTA<br>A                   | 58.78 | ACGTGTTAGCCTACGGT<br>GAA      | 59.04 |
| SSR_P0_494816190 <sup>#</sup> | p1 | (T)10                              | 10 | P0 | 494,816,190 | 494,816,199 | AGCTTTTAAGGATGGTGGC<br>A                   | 57.40 | TGAGATCCAATGAGAAT<br>AAAATGGG | 57.17 |
| SSR_P0_495003120 <sup>#</sup> | p3 | (GAA)4                             | 12 | P0 | 495,003,120 | 495,003,131 | GTTGGGTTGGCAATGGACA<br>T                   | 59.02 | CTCGACTTGTGCTTAGC<br>AC       | 59.01 |
| SSR_P0_495031739              | p3 | (AAC)4<br>(TA)6cac(A               | 12 | P0 | 495,031,739 | 495,031,750 | GCGACGCCTTTCAGATTTTC<br>A                  | 59.20 | CTTCCTAGACCCACCTG<br>TG       | 59.10 |
| SSR_P0_495114418 <sup>#</sup> | c  | T)7                                | 29 | P0 | 495,114,418 | 495,114,446 | GGTTGGGCTTGATGACTGT<br>G                   | 59.12 | TCTTATCTCTCCGCACCG<br>AC      | 58.98 |
| SSR_P0_496173676 <sup>#</sup> | p1 | (T)10                              | 10 | P0 | 496,173,676 | 496,173,685 | TCCATACCGCGACAACAA<br>AC                   | 58.85 | GCTCGTGTGTTTGC GTT<br>TT      | 58.74 |
| SSR_P0_496193829 <sup>#</sup> | p3 | (TTC)4                             | 12 | P0 | 496,193,829 | 496,193,840 | TGTCCTCCTCCTTCTTGT<br>TTTTTCATGGCCAGGACTTC | 57.30 | GCAGCGACAGGAGTTGA<br>AAA      | 59.06 |
| SSR_P0_496530536              | p3 | (ATC)4                             | 12 | P0 | 496,530,536 | 496,530,547 | TGTCGCTGTGCATGTAGTT<br>G                   | 58.47 | ATTTGCGTCTGTTCCGGTG<br>TT     | 58.70 |
| SSR_P0_496647902 <sup>#</sup> | p3 | (AAT)4                             | 12 | P0 | 496,647,902 | 496,647,913 | TGTCGCTGTGCATGTAGTT<br>G                   | 58.85 | CCGACATTGGAACCGT<br>GTT       | 59.05 |
| SSR_P0_498360802 <sup>#</sup> | p4 | (AAAT)4                            | 16 | P0 | 498,360,802 | 498,360,817 | GCCATGCAAACAGGAAAG<br>GA                   | 59.03 | TTGGGGTGGGTATGAAA<br>GGT      | 58.54 |
| SSR_P0_503923900 <sup>#</sup> | p6 | (AAAAGG)                           | 30 | P0 | 503,923,900 | 503,923,929 | TTGGGATCTTCGTCAGCAG                        | 59.02 | TGTCATGGGGTAGACAG             | 57.08 |

|                               |    |                         |    |    |             |             |                                        |                                           |
|-------------------------------|----|-------------------------|----|----|-------------|-------------|----------------------------------------|-------------------------------------------|
| SSR_P0_506473556 <sup>#</sup> | c* | 5<br>(CTAT)8(T<br>AT)7* | 50 | P0 | 506,473,556 | 506,473,605 | T<br>TAATCACTCCACAGGCTGC<br>A<br>59.02 | AGA<br>CCACACACGTTTTAGGG<br>AAGA<br>58.16 |
| SSR_P0_512937722 <sup>#</sup> | p6 | (TTTGAA)4               | 24 | P0 | 512,937,722 | 512,937,745 | TGTTGCTCGATTAGGCTGG<br>A<br>59.10      | GTTTTCAAGCAGTGCCTC<br>GA<br>59.06         |
| SSR_P0_526557141 <sup>#</sup> | p5 | (TTTTG)4                | 20 | P0 | 526,557,141 | 526,557,160 | TTCGGCTGGAAAAGGATTG<br>G<br>58.46      | CGAGGGAAGTAGGGTTA<br>GGG<br>58.59         |
| SSR_P0_530599646 <sup>#</sup> | p5 | (TG TTC)5               | 25 | P0 | 530,599,646 | 530,599,670 | TTAGGGGCCCAACAGAAG<br>AG<br>59.01      | CTCATTCGTGTCGGTGTT<br>GG<br>59.21         |
| SSR_P0_538786861 <sup>#</sup> | p6 | (TTCAGT)4               | 24 | P0 | 538,786,861 | 538,786,884 | CACTGCTCAAACACCACGA<br>A<br>58.99      | ATAGTTCAGCGCGCAA<br>TAC<br>58.78          |
| SSR_P0_547445673 <sup>#</sup> | p5 | (TAAAA)4                | 20 | P0 | 547,445,673 | 547,445,692 | TTCCACCCTTACAGCTGAG<br>G<br>59.02      | AAGAAAGGGGTGGGGTA<br>TGG<br>58.99         |
| SSR_P0_570807688 <sup>#</sup> | c* | (TAGA)5(A<br>G)8*       | 33 | P0 | 570,807,688 | 570,807,720 | GTAGGGCAAGGAGAGAGC<br>AA<br>59.10      | GATCCCAACTGAGCTCC<br>TGT<br>59.09         |
| SSR_P0_573751529 <sup>#</sup> | p5 | (TTTGT)4                | 20 | P0 | 573,751,529 | 573,751,548 | CCTAAGTCAATCCGGCTCC<br>T<br>58.88      | CTTGGGCTCAACGTATG<br>GTG<br>58.91         |
| SSR_P0_580381951 <sup>#</sup> | p4 | (TTTA)6<br>(AATAAA)     | 24 | P0 | 580,381,951 | 580,381,974 | TCAAATGGCTTCTGTTGAG<br>GT<br>57.77     | AGAGTATCTGACACGCA<br>CCA<br>58.45         |
| SSR_P0_587527153 <sup>#</sup> | p6 | 4                       | 24 | P0 | 587,527,153 | 587,527,176 | TCCAAACTACAAGCCTGCC<br>T<br>59.23      | TGACACCAAGCGACAAC<br>TTT<br>58.26         |
| SSR_P0_587565701 <sup>#</sup> | p4 | (AATA)4                 | 16 | P0 | 587,565,701 | 587,565,716 | GCCGGTGATTTAATATTTT<br>GTGCA<br>58.89  | ACA<br>58.86                              |
| SSR_P0_593258174 <sup>#</sup> | p4 | (AACC)4                 | 16 | P0 | 593,258,174 | 593,258,189 | CCATGCCCTAAACGTGACA<br>G<br>58.91      | CTTAGCCATAGTCGGGA<br>GCA<br>58.96         |

|                               |    |                    |    |    |             |             |                            |       |                             |       |
|-------------------------------|----|--------------------|----|----|-------------|-------------|----------------------------|-------|-----------------------------|-------|
| SSR_P0_595611863 <sup>#</sup> | c  | (TA)7ttg(AT)<br>)7 | 31 | P0 | 595,611,863 | 595,611,893 | GCGGCATACAAAGGAAGG<br>AG   | 58.98 | GAGTAGACCCTGGGCAA<br>TGA    | 58.80 |
| SSR_P0_596062534 <sup>#</sup> | c  | (AT)12(AC<br>AT)4  | 40 | P0 | 596,062,534 | 596,062,573 | TCAACAGTACGGCAGGAC<br>AT   | 59.03 | ATTCTGAACGCGTGCTTC<br>TC    | 58.93 |
| SSR_P0_597136478 <sup>#</sup> | p1 | (A)10              | 10 | P0 | 597,136,478 | 597,136,487 | GGCAATTGTCTAGGGCTTC<br>A   | 57.87 | TCGTGCATCTCAATCATA<br>TCAGT | 57.79 |
| SSR_P0_597243550 <sup>#</sup> | p1 | (A)10              | 10 | P0 | 597,243,550 | 597,243,559 | TGATGTGCAGTGGATGGGT<br>A   | 58.72 | AGACTGAGGGACGGGTA<br>GTA    | 58.71 |
| SSR_P0_597479614 <sup>#</sup> | p1 | (A)10              | 10 | P0 | 597,479,614 | 597,479,623 | ACACAACCAACCCCATAA<br>AGTG | 59.04 | GCGTGAGGAGAGGAGAA<br>TGA    | 58.89 |
| SSR_P0_597975613              | p1 | (T)10              | 10 | P0 | 597,975,613 | 597,975,622 | AATCCCCTGCCTTGTTG<br>C     | 59.31 | AGAGGATGATGGTGTG<br>GCT     | 58.71 |
| SSR_P0_599973541              | p4 | (GAAA)4            | 16 | P0 | 599,973,541 | 599,973,556 | CCAACAATCACTGCAGGCT<br>T   | 59.04 | GTGCCAATTACGTCCGG<br>TTC    | 59.56 |
| SSR_P0_601491402              | p2 | (TA)7              | 14 | P0 | 601,491,402 | 601,491,415 | AGTTCGACCCTTGTGTCAC<br>A   | 59.17 | AGAGGTGGAAGGTTGGA<br>GTC    | 58.65 |
| SSR_P0_603004334              | p2 | (AT)7              | 14 | P0 | 603,004,334 | 603,004,347 | AATGATTGGACGTGGCATG<br>C   | 59.54 | TCTGGTGGCAGTGGACT<br>ATG    | 59.10 |
| SSR_P0_604165084 <sup>#</sup> | p2 | (AT)7              | 14 | P0 | 604,165,084 | 604,165,097 | CGCCGGACTTAACCTGAAA<br>C   | 59.21 | GGAATTCCTGGGGCAA<br>TGG     | 59.17 |
| SSR_P0_606387537              | p3 | (TTA)6             | 18 | P0 | 606,387,537 | 606,387,554 | TTGTTCCCTCAAGTGGACC<br>A   | 58.78 | CGTCGGAGTGGCTAAAA<br>TGA    | 58.00 |
| SSR_P0_606517693              | p3 | (TGT)5             | 15 | P0 | 606,517,693 | 606,517,707 | TGAGGGTCTTTCGGGAAAC<br>A   | 58.87 | GACTGCATTTTCCACTA<br>ACCA   | 58.85 |
| SSR_P0_606531330              | p3 | (TGT)4             | 12 | P0 | 606,531,330 | 606,531,341 | ACAATCTCTCTGCCCCACA<br>A   | 58.93 | GAGCACCCCTTTACTCCTC<br>GT   | 59.10 |

|                               |    |                        |    |    |             |             |                              |       |                            |       |
|-------------------------------|----|------------------------|----|----|-------------|-------------|------------------------------|-------|----------------------------|-------|
| SSR_P0_607395188              | p3 | (TTG)4                 | 12 | P0 | 607,395,188 | 607,395,199 | TGGTTTCTCTCAACTCTGC<br>CA    | 59.23 | GGCGAATCGGATGTCAA<br>CAA   | 58.92 |
| SSR_P0_608011956              | p3 | (CAA)5                 | 15 | P0 | 608,011,956 | 608,011,970 | TTAGCGTGACATCTTTGCC<br>G     | 58.92 | ACGCCTGGAATTACACT<br>GGT   | 59.31 |
| SSR_P0_609133294 <sup>#</sup> | c* | (A)10(AT)7<br>*        | 23 | P0 | 609,133,294 | 609,133,316 | ACGGGATGATATTATTCGA<br>ATGGA | 57.71 | TATCAACTGGGCCGGAT<br>CTC   | 58.95 |
| SSR_P0_610565641 <sup>#</sup> | c  | (AT)7c(TA)<br>7        | 29 | P0 | 610,565,641 | 610,565,669 | TCCGGCAAGTACTTACCCT<br>T     | 58.35 | CCGCCCCAAACTAGACA<br>GAT   | 59.46 |
| SSR_P0_635258944 <sup>#</sup> | p5 | (TAGTG)4<br>(A)10(AAT) | 20 | P0 | 635,258,944 | 635,258,963 | CACCCGCAACCAAGATCA<br>AA     | 59.04 | GCCACCATGTAAGCTTC<br>CAC   | 59.19 |
| SSR_P0_643195941 <sup>#</sup> | c* | 5*                     | 23 | P0 | 643,195,941 | 643,195,963 | TGAGCCTCATATTGTGCCC<br>T     | 58.78 | AGGTGCCACGTCCAATA<br>GAT   | 58.80 |
| SSR_P0_647206762 <sup>#</sup> | p5 | (AAGAG)4               | 20 | P0 | 647,206,762 | 647,206,781 | TTTCCCCGGCAAATATCC<br>A      | 57.47 | CCCCATCTTGCAGGAATT<br>CG   | 58.97 |
| SSR_P0_655489419 <sup>#</sup> | p5 | (TAATT)6<br>(A)10(AAA  | 30 | P0 | 655,489,419 | 655,489,448 | TCTACGACTACAGCGTACC<br>T     | 57.32 | CGACCTCAACAAGACTC<br>TATGC | 58.82 |
| SSR_P0_672904565              | c* | AG)4*                  | 26 | P0 | 672,904,565 | 672,904,590 | CGCAGAAATACGTTGGGCT<br>A     | 58.35 | GCCGACGATGATCTACT<br>CCT   | 58.76 |
| SSR_P0_684352014 <sup>#</sup> | p5 | (AAAAC)4               | 20 | P0 | 684,352,014 | 684,352,033 | CACGAGCTCAAGGTGAAT<br>CA     | 57.92 | TGGACCTCTTGCATCCGT<br>AA   | 58.73 |
| SSR_P0_705767169 <sup>#</sup> | p5 | (TTTAT)4<br>(A)15(AT)8 | 20 | P0 | 705,767,169 | 705,767,188 | TGTCCACCATTTTCCTGTT<br>GT    | 57.98 | AAGCAAGCAAGAGAGTC<br>AGC   | 58.48 |
| SSR_P0_706518612 <sup>#</sup> | c* | *                      | 30 | P0 | 706,518,612 | 706,518,641 | GCTAGGGCCACGACTAAG<br>AT     | 58.96 | AGGCATACTTAAAGCAC<br>GCT   | 57.60 |
| SSR_P0_706679929 <sup>#</sup> | p6 | (ATCTGA)4              | 24 | P0 | 706,679,929 | 706,679,952 | GGGGCAGAATTGTACAAG<br>CC     | 59.18 | ACGTCATCCATCAGACC<br>ACA   | 58.73 |

|                               |    |                                                |    |    |             |             |                             |       |                             |       |
|-------------------------------|----|------------------------------------------------|----|----|-------------|-------------|-----------------------------|-------|-----------------------------|-------|
| SSR_P0_707670527 <sup>#</sup> | p5 | (GAAAA)4<br>(ATT)5t(AT<br>A)4                  | 20 | P0 | 707,670,527 | 707,670,546 | CACTTGACTCACAGCGATG<br>G    | 58.93 | CCACCCGCTGATAACCA<br>AGA    | 59.75 |
| SSR_P0_712009853 <sup>#</sup> | c  | (CAC)4aaatt<br>ttagtagattctta<br>atcattggtacta | 28 | P0 | 712,009,853 | 712,009,880 | ATGCTTCGTCCTCTGTCCT<br>C    | 59.18 | AGAGGTCAACTAGCCAA<br>AGAAA  | 57.29 |
| SSR_P0_712433624 <sup>#</sup> | c  | c(GTT)4<br>(AAAAAT)                            | 57 | P0 | 712,433,624 | 712,433,680 | CCCCTCCCTCAATTCACCT<br>T    | 59.00 | ATGAACAAGAATCCAAA<br>CAAGCT | 57.20 |
| SSR_P0_712988435 <sup>#</sup> | p6 | 4<br>(ATAC)6ata                                | 24 | P0 | 712,988,435 | 712,988,458 | TGCTCCGACACATATGGAG<br>T    | 58.52 | GACGCAACACCAGACAA<br>CAT    | 59.06 |
| SSR_P0_713201073 <sup>#</sup> | c  | tatat(AC)7                                     | 46 | P0 | 713,201,073 | 713,201,118 | ATCCTTCATCCCACGTCGA<br>A    | 58.81 | ATTTCCCACACCTACTCG<br>CA    | 59.02 |
| SSR_P0_713466835              | p4 | (AAAT)4                                        | 16 | P0 | 713,466,835 | 713,466,850 | TCTGCTTCAACACTATTCA<br>GACA | 57.79 | ACTGCTCCTCTCCGAAG<br>ATG    | 58.89 |
| SSR_P0_713643490              | p4 | (TAAA)4                                        | 16 | P0 | 713,643,490 | 713,643,505 | TGAAGTAGACAAATCACC<br>GACT  | 57.13 | AAGACATGGGCGGAGGA<br>AAA    | 59.60 |
| SSR_P0_714045050 <sup>#</sup> | p4 | (AAAT)5                                        | 20 | P0 | 714,045,050 | 714,045,069 | TAATGCCTCCCTGATACCC<br>C    | 58.26 | TGCTACCATCTTGCGTGA<br>TC    | 58.06 |
| SSR_P0_714546534 <sup>#</sup> | p2 | (TA)7                                          | 14 | P0 | 714,546,534 | 714,546,547 | ATGAGAAGGGGTGTACGA<br>GC    | 59.18 | GAAAAGGTTGGTGTTCG<br>GCT    | 58.97 |
| SSR_P0_714547079 <sup>#</sup> | p3 | (CAC)4                                         | 12 | P0 | 714,547,079 | 714,547,090 | GCCGAACACCAACCTTTTC<br>T    | 58.97 | AGTTGAAGGGTCTGGCT<br>TGA    | 58.86 |
| SSR_P0_714549623 <sup>#</sup> | p2 | (AT)6                                          | 12 | P0 | 714,549,623 | 714,549,634 | AGAAGGATGAATCGGCCC<br>TT    | 58.78 | ATCGTCATCATGGCCTA<br>GGG    | 59.02 |
| SSR_P0_714550164              | p3 | (TGA)4                                         | 12 | P0 | 714,550,164 | 714,550,175 | CGTAACGGAATCCTACCAC<br>C    | 57.79 | TTCTCCGACATGACTGCT<br>CA    | 58.74 |

|                               |    |          |    |    |             |             |                                            |       |                           |       |
|-------------------------------|----|----------|----|----|-------------|-------------|--------------------------------------------|-------|---------------------------|-------|
| SSR_P0_714575011              | p1 | (A)10    | 10 | P0 | 714,575,011 | 714,575,020 | GTTTCAGGGTGAGGAGTGA<br>GG                  | 59.39 | TGTTTTGTGGTCAGGGTG<br>TG  | 58.53 |
| SSR_P0_714623683 <sup>#</sup> | p4 | (ATGT)10 | 40 | P0 | 714,623,683 | 714,623,722 | TGTCAACAAGGCATGACTT<br>TGA                 | 58.71 | ACTAGCGTGTACCAGTT<br>GCT  | 59.03 |
| SSR_P0_714657262              | p1 | (A)10    | 10 | P0 | 714,657,262 | 714,657,271 | GTATCGTGCCAGCAAGTAC<br>A                   | 58.00 | ATTGGTGGTGGTCTGGG<br>TAG  | 59.01 |
| SSR_P0_714673559              | p3 | (CAA)4   | 12 | P0 | 714,673,559 | 714,673,570 | TTGGCATGTGTCCTATCGG<br>T                   | 59.09 | AGCTTCGGAATTAGGGG<br>TCT  | 58.12 |
| SSR_P0_714675881              | p3 | (TGC)4   | 12 | P0 | 714,675,881 | 714,675,892 | CCTGTATCTTCCTCGTCCC<br>C                   | 58.96 | TCCACCGGAGACAGACT<br>TTC  | 59.03 |
| SSR_P0_714679449 <sup>#</sup> | p1 | (T)10    | 10 | P0 | 714,679,449 | 714,679,458 | CTGGTCCCTCTTCCTCTCC<br>AGGCTCTCACGCTTCTCTA | 58.80 | CCAGGAAGGCTCTTAAG<br>GGT  | 58.71 |
| SSR_P0_714680259              | p3 | (TCA)4   | 12 | P0 | 714,680,259 | 714,680,270 | C<br>ACGCAAATTCACACCTAA                    | 58.90 | TGCATTGAAGGAGGCTT<br>TGT  | 58.00 |
| SSR_P0_714733497 <sup>#</sup> | p1 | (T)10    | 10 | P0 | 714,733,497 | 714,733,506 | GAGA                                       | 58.61 | TGGGAGAGACTTAAGGA<br>GAGG | 57.61 |

<sup>a</sup>The 65 polymorphic SSR markers were labeled with #.





## II. Supplementary Figures

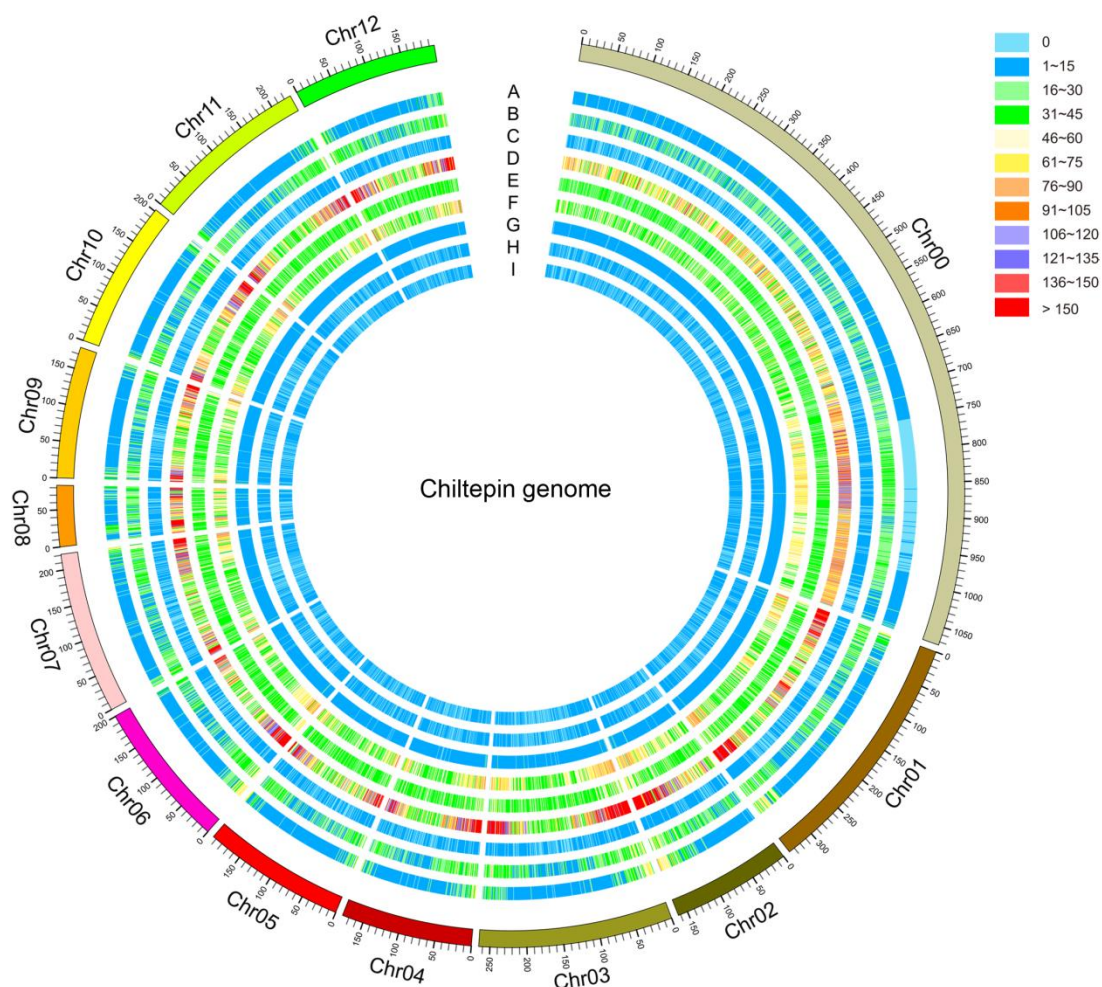

**Supplementary Figure S1. Overview of SSR distribution in Chiltepin genome.**

A total of 859,515 SSR loci with 123,281 presented in compound formation (C and C\*), which form into 736,234 SSR units, were identified in the Chiltepin genome. The various number of SSR units and protein coding genes in each window size of 1000kb were used for drawing this picture and showed with different colours. Track A shows the gene density, tracks B to I refer to the C, C\*, Mono-, Di-, Tri-, Tetra-, Penta-, Hexa- type, respectively.

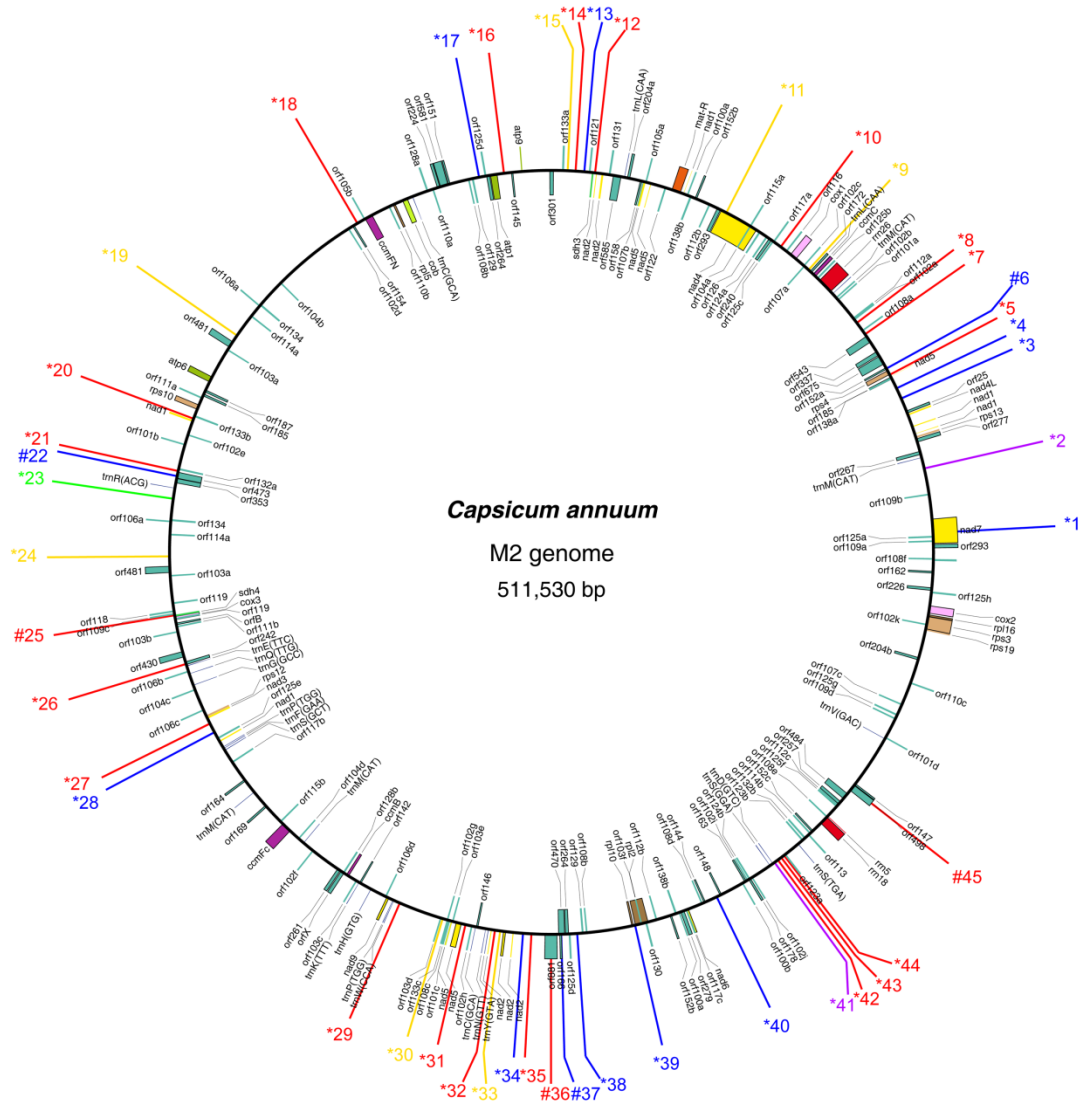

**Supplementary Figure S2. Overview of SSR distribution in pepper M2 mitochondrial genome.**

The M2 genome refers to the mitochondrial genome of pepper line ‘Jeju’ (*Capsicum annuum*). Perfect SSRs with 1, 2, 3 and 4 bp length of motif were represented by red, yellow, blue and green lines, respectively. And compound SSRs were showed with purple lines. Number with \* and # in the front means that the corresponding SSRs were located in the intergenic and genic region, respectively.

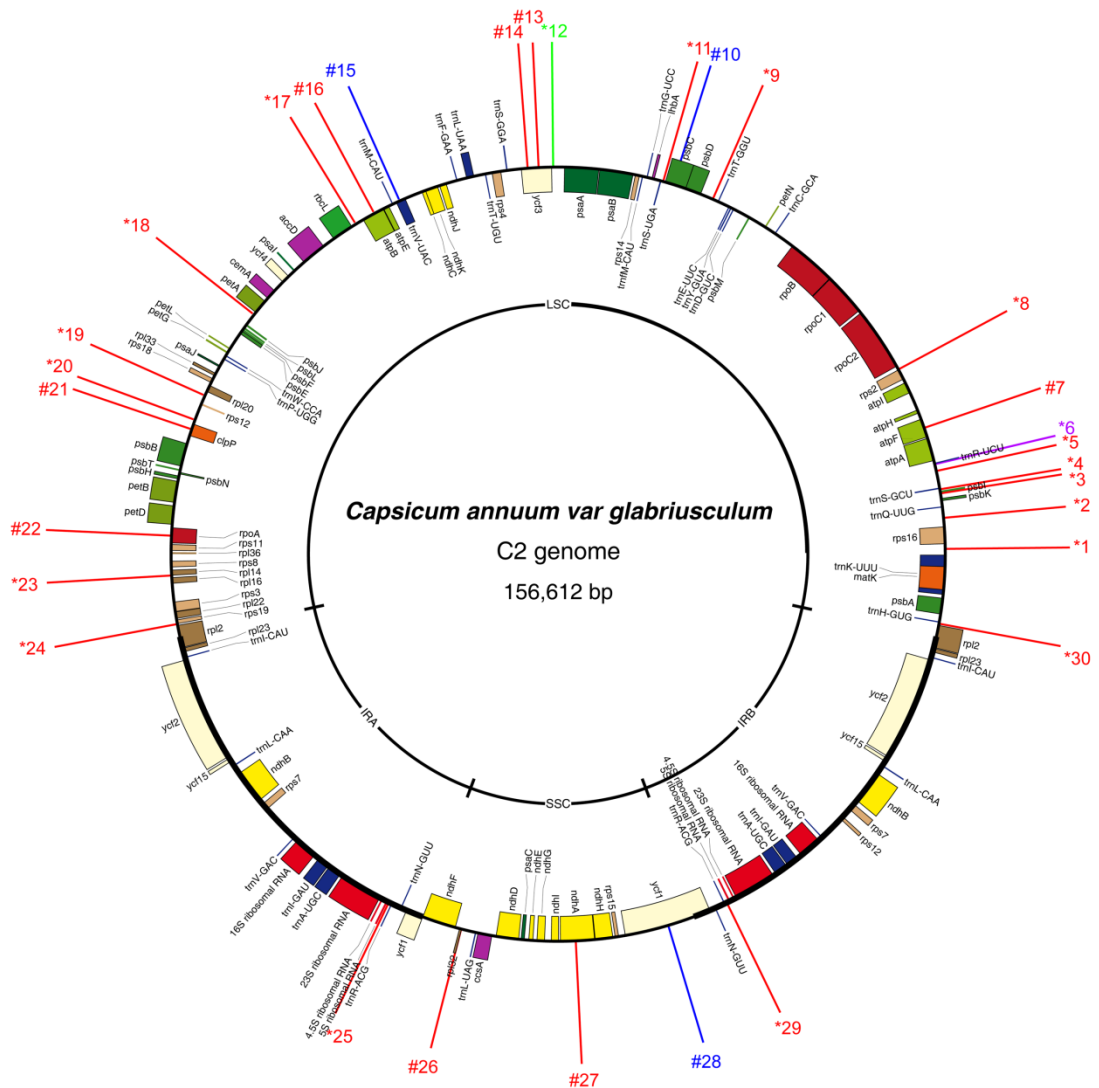

**Supplementary Figure S3. Overview of SSR distribution in pepper C2 chloroplast genome.**

The C2 genome refers to the chloroplast genome of semi-wild pepper line ‘American bird pepper’ (*C. annuum* var. *glabriusculum*). Perfect SSRs with 1, 3 and 4 bp length of motif were represented by red, blue and green lines, respectively. And compound SSRs were showed with purple lines. Number with \* and # in the front means that the corresponding SSRs were located in the intergenic and genic region, respectively.

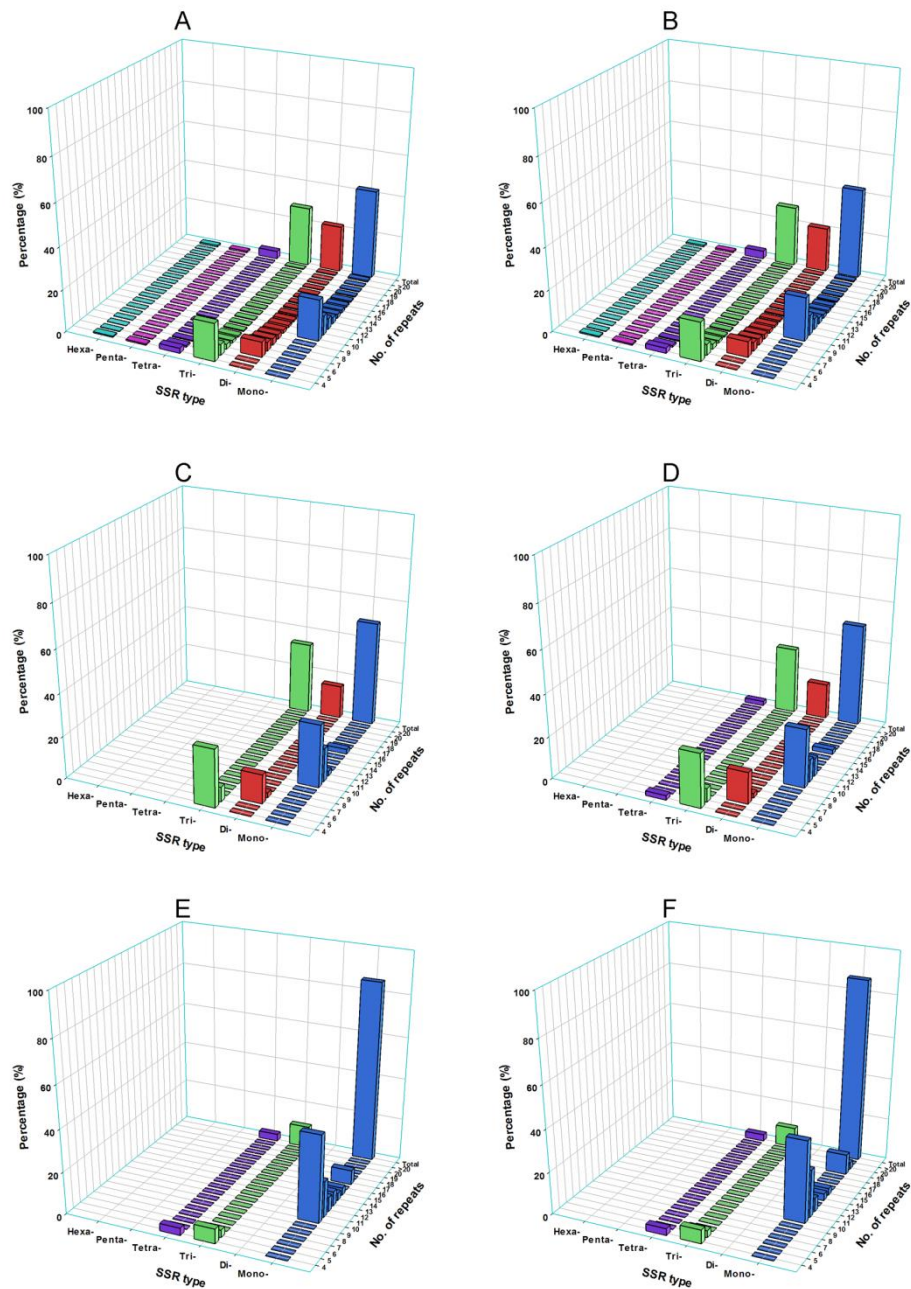

**Supplementary Figure S4. Relative frequency of SSR motif with different length, by the number of repeats in six pepper genomes.**

**A** and **B** for the nuclear genomes N1 and N2; **C** and **D** for the mitochondrial genomes M1 and M2; **E** and **F** for the chloroplast genomes C1 and C2, respectively. The graph was based on the total SSR motif identified in nuclear ( $n_{N1}= 876,580$  and  $n_{N2}= 859,515$ ), mitochondrial ( $n_{M1}=44$  and  $n_{M2}=47$ ) and chloroplast ( $n_{C1}=29$  and  $n_{C2}=31$ ) genomes.

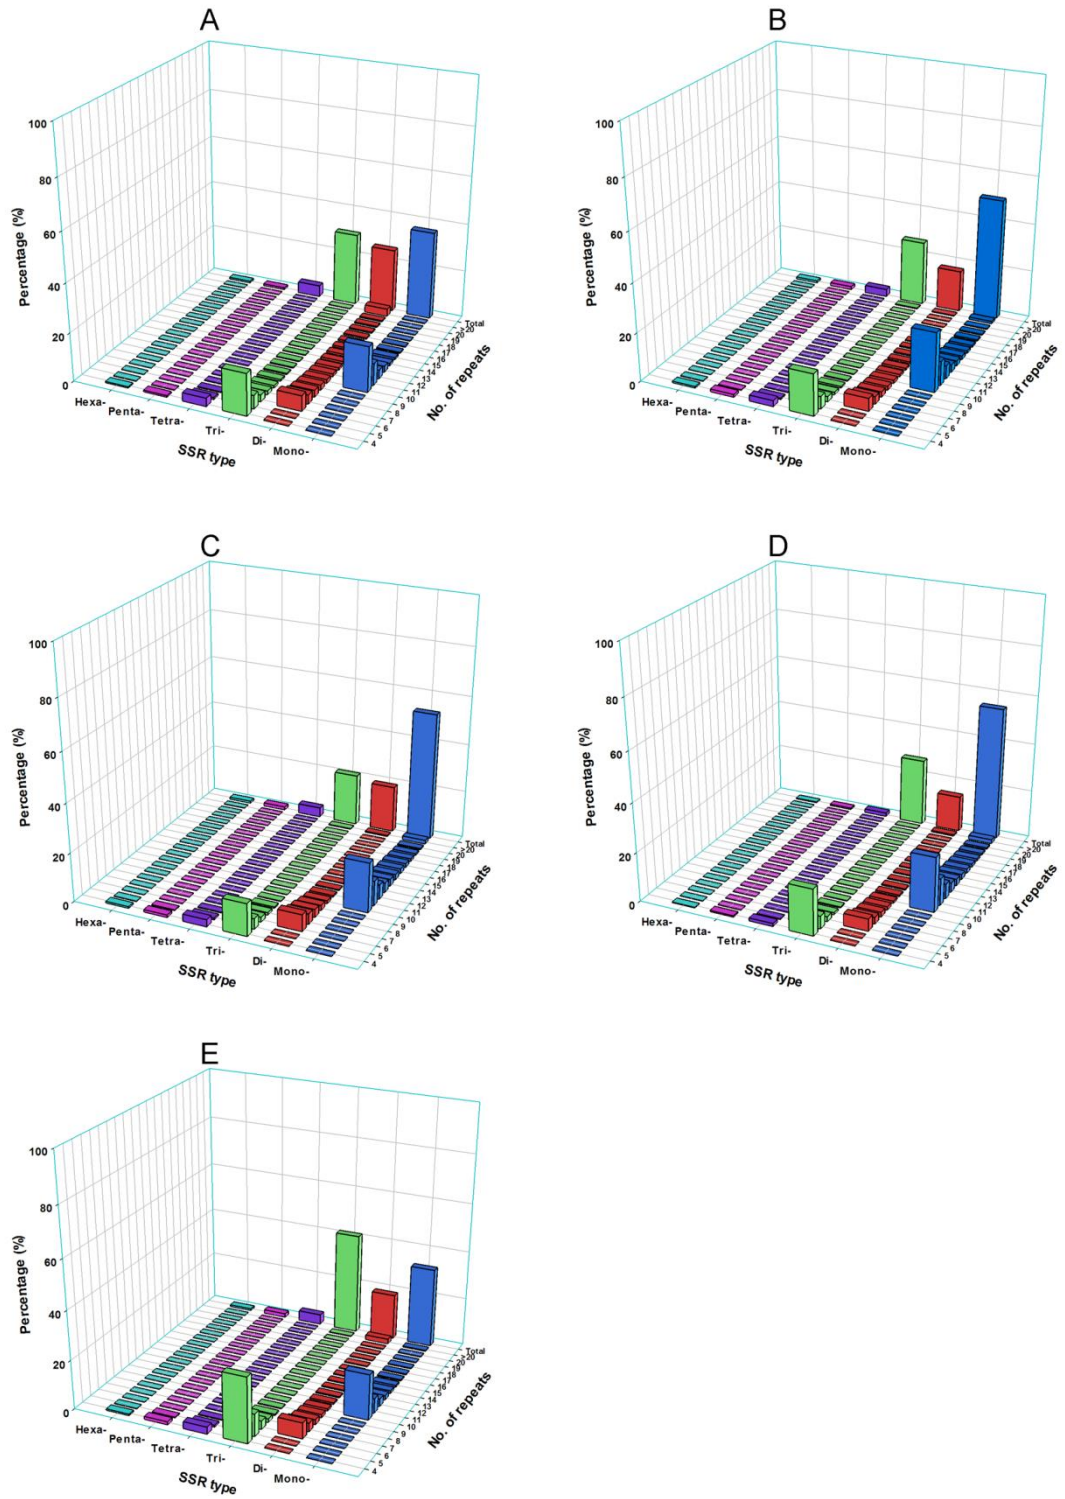

**Supplementary Figure S5. Relative frequency of SSR motif with different length, by number of repeats in five plant species.**

**A, Tomato; B, Potato; C, Cucumber; D, Arabidopsis; E, Rice.**

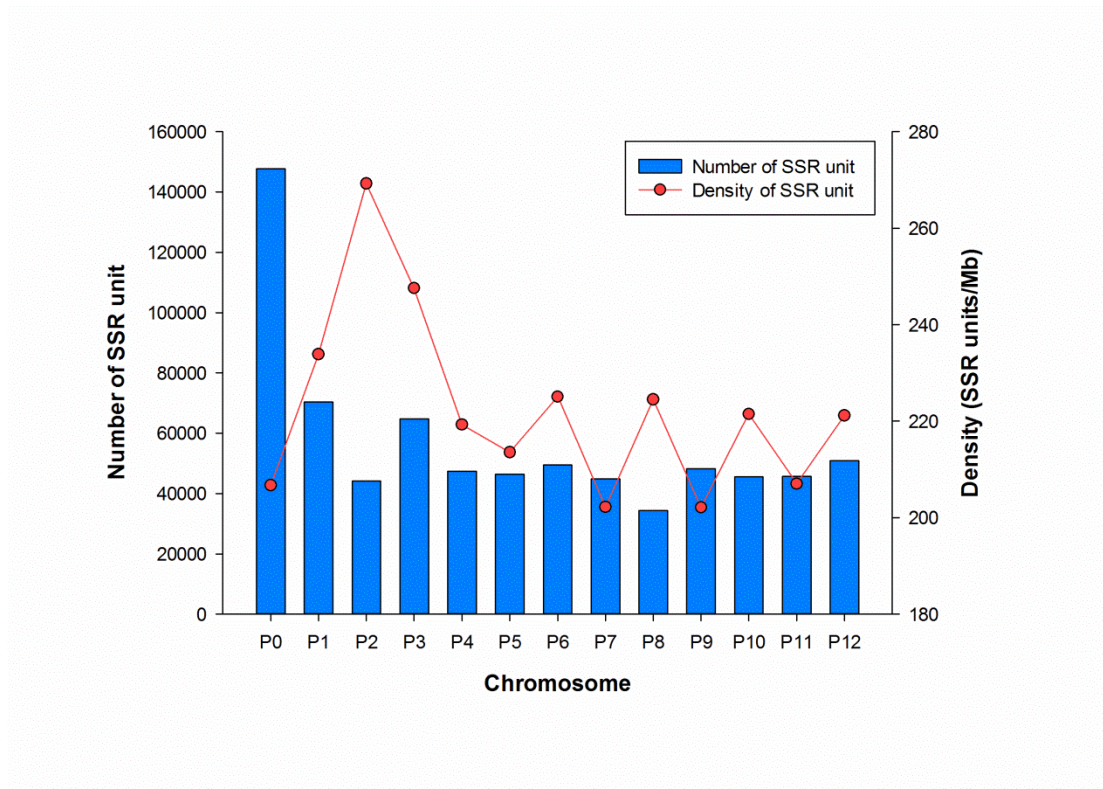

**Supplementary Figure S6. Number and density comparison of SSR units on 13 chromosomes of Zunla-1 reference genome.**

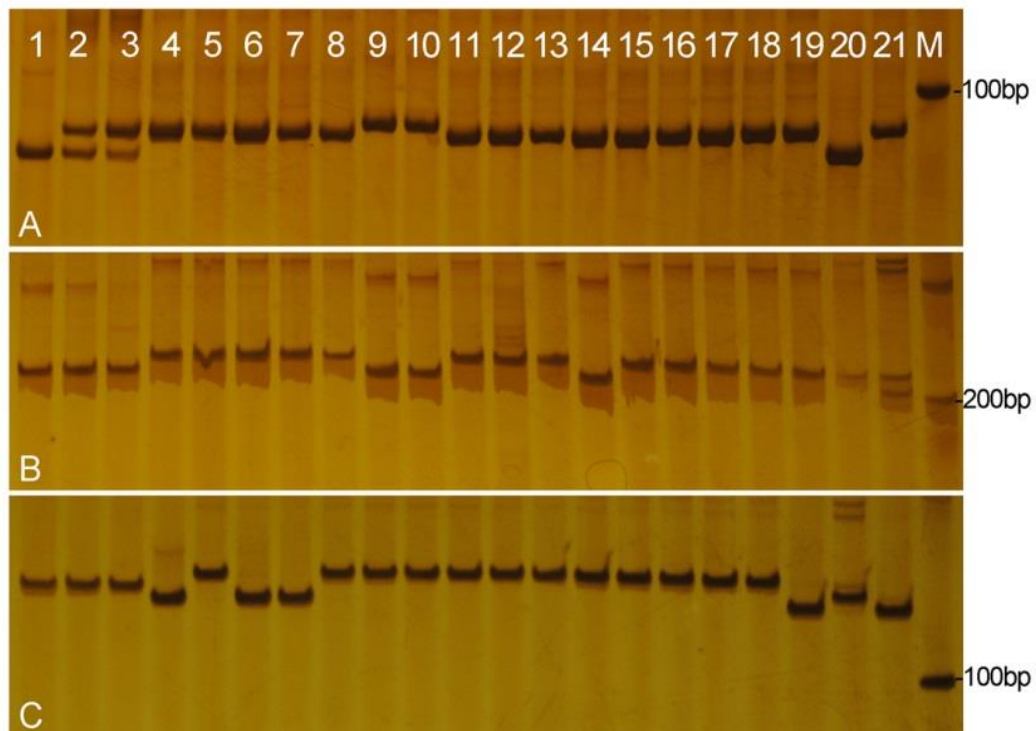

**Supplementary Figure S7. Genotyping of 21 pepper lines with three newly developed polymorphic SSR markers.**

The order of sampling application on 21 lanes (1~21) was same to the order of samples in **Supplementary Table S1**. Lane M, Marker I (100~600 bp ladder). **A**, **B** and **C** for the marker `SSR_P0_580381951`, `SSR_P0_655489419` and `SSR_P0_449855951`, respectively.
